# Supplementary material for: A facile room temperature solution synthesis of SnO2quantum dots for perovskite solar cells
Source: Royal Society of Chemistry journal article supplement (doi:10.1039/c8ta12561a), 2019-01-01
Supplement: c8ta12561a1.pdf [file c8ta12561a1.pdf]

Supporting Information

# **A facile room temperature solution synthesis of SnO<sub>2</sub> quantum dots for perovskite solar cells**

Hongri Liu,<sup>†,‡</sup> Zhiliang Chen,<sup>†</sup> Haibing Wang,<sup>†</sup> Feihong Ye,<sup>†</sup> Junjie Ma,<sup>†</sup> Xiaolu Zheng,<sup>†</sup>  
Pengbing Gui,<sup>†</sup> Liangbin Xiong,<sup>†</sup> Jianwen,<sup>‡</sup> and Guojia Fang<sup>†\*</sup>

<sup>†</sup>Key Laboratory of Artificial Micro- and Nano-structures of Ministry of Education of China,  
School of Physics and Technology, Wuhan University, Wuhan 430072, People's Republic of  
China

<sup>‡</sup>College of Physics and Electronic Science, Hubei Normal University, Huangshi 435002,  
People's Republic of China

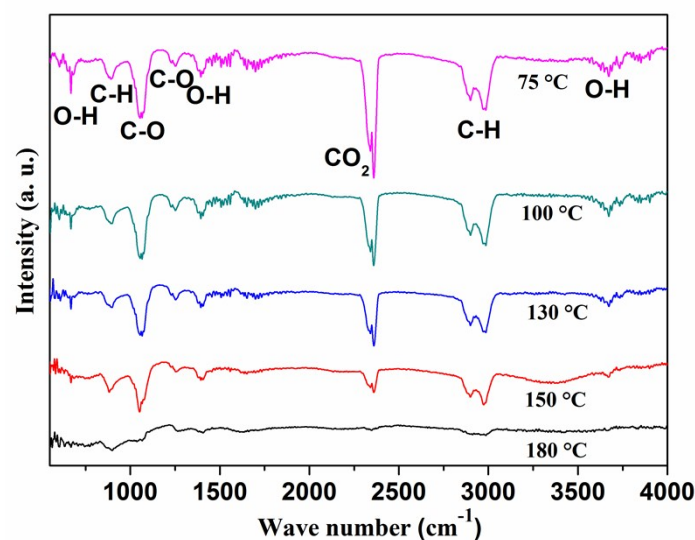

Fig. S1 FTIR spectra of Q-ETL annealed at 75 °C, 100 °C, 130 °C, 150 °C, and 180 °C for 1h.

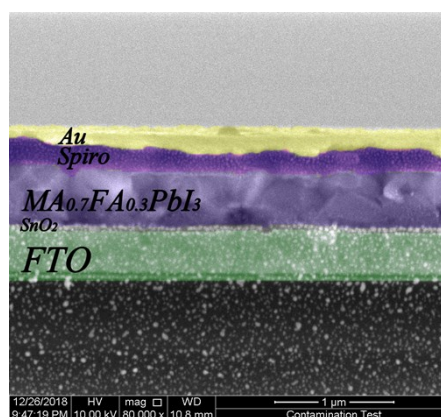

Fig. S2 Cross-sectional SEM image of a PSC fabricated on Q-ETL.

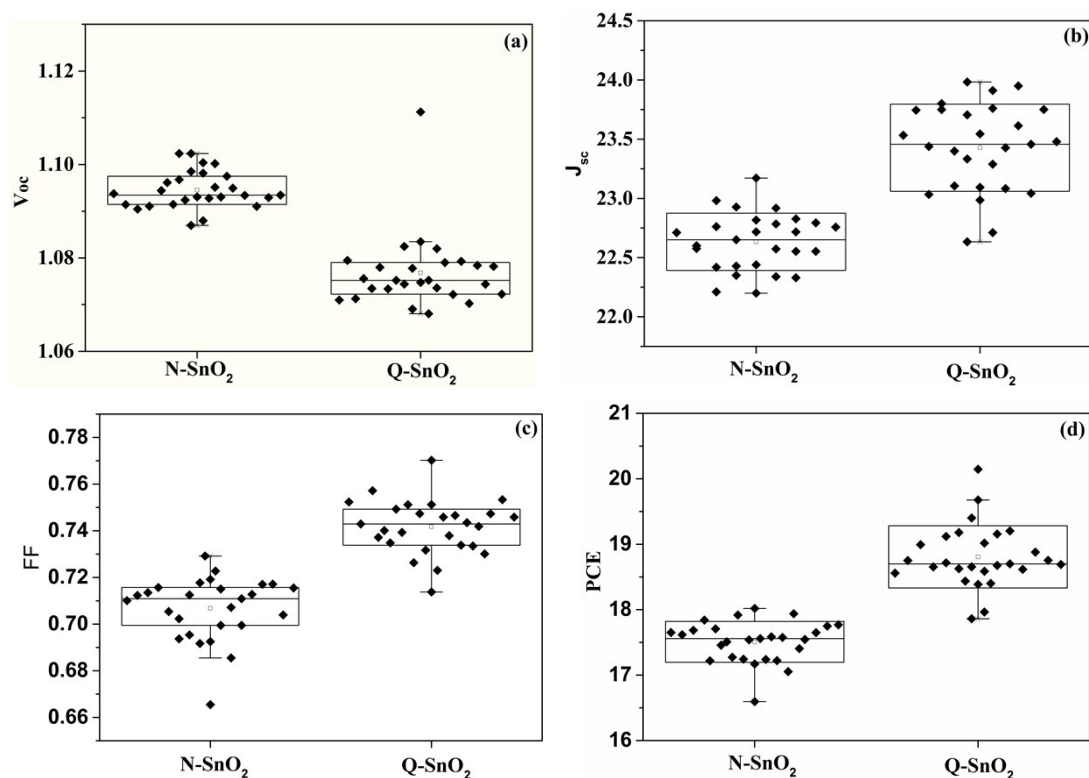

Fig. S3 Statistical parameters of devices based on 180° C annealed ETLs (a) open-circuit voltage, (b)  $J_{SC}$ , (c) fill factor, (d) power conversion efficiency (PCE).

**C60-sam process method:** 1 mg C<sub>60</sub>-sam was dissolved in chlorobenzene by an ultrasonication process and stirring for 1 h in sequence to obtain the precursor solution. Before the deposition of perovskite, the precursor solution was deposited on SnO<sub>2</sub> ETLs by spin coating with 3000 r/min for 30 s.

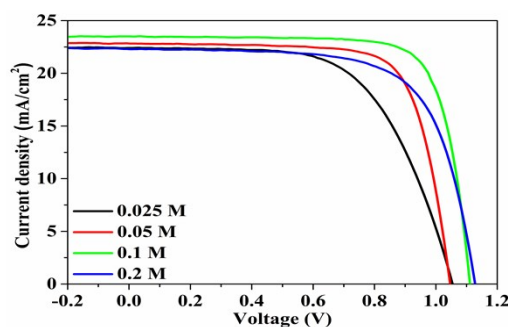

Fig. S4 J-V curves of the cells prepared on FTO substrate coated with SnO<sub>2</sub>ETLs prepared using Q-SnO<sub>2</sub> colloidal solutions with different concentrations.

Table S1 Photovoltaic parameters of the cells based on the Q-SnO<sub>2</sub> ETLs coated on FTO substrates with different concentrations. The data are received from Fig. S5

| concentration | Voc  | Jsc   | FF   | PCE (%) |
|---------------|------|-------|------|---------|
| 0.025M        | 1.05 | 21.92 | 0.61 | 14.07   |
| 0.05 M        | 1.05 | 22.83 | 0.74 | 17.71   |
| 0.1 M         | 1.11 | 22.99 | 0.77 | 20.11   |
| 0.2 M         | 1.13 | 22.29 | 0.68 | 17.23   |

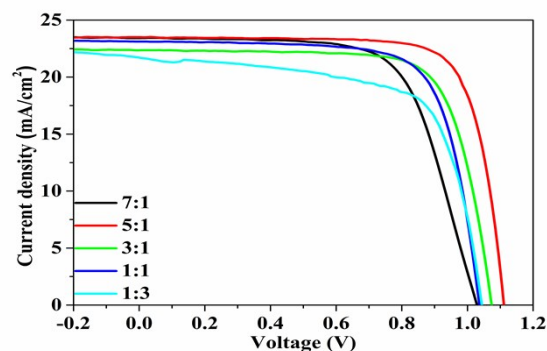

Fig. S5 J-V curves of the cells prepared on FTO/Q-ETLs with different ratio of anhydrous alcohol to deionized water.

Table S2 Photovoltaic parameters of the cells based on the Q-SnO<sub>2</sub> ETLs coated on FTO substrates using Q-SnO<sub>2</sub> colloidal solution with different ratio of anhydrous alcohol to deionized water. The data are received from Fig. S5.

| ratio | Voc  | Jsc   | FF   | PCE (%) |
|-------|------|-------|------|---------|
| 7:1   | 1.03 | 23.42 | 0.67 | 16.18   |
| 5:1   | 1.11 | 22.99 | 0.77 | 20.11   |
| 3:1   | 1.07 | 21.86 | 0.74 | 17.40   |
| 1:1   | 1.04 | 22.61 | 0.73 | 17.15   |
| 1:3   | 1.04 | 21.23 | 0.68 | 15.06   |

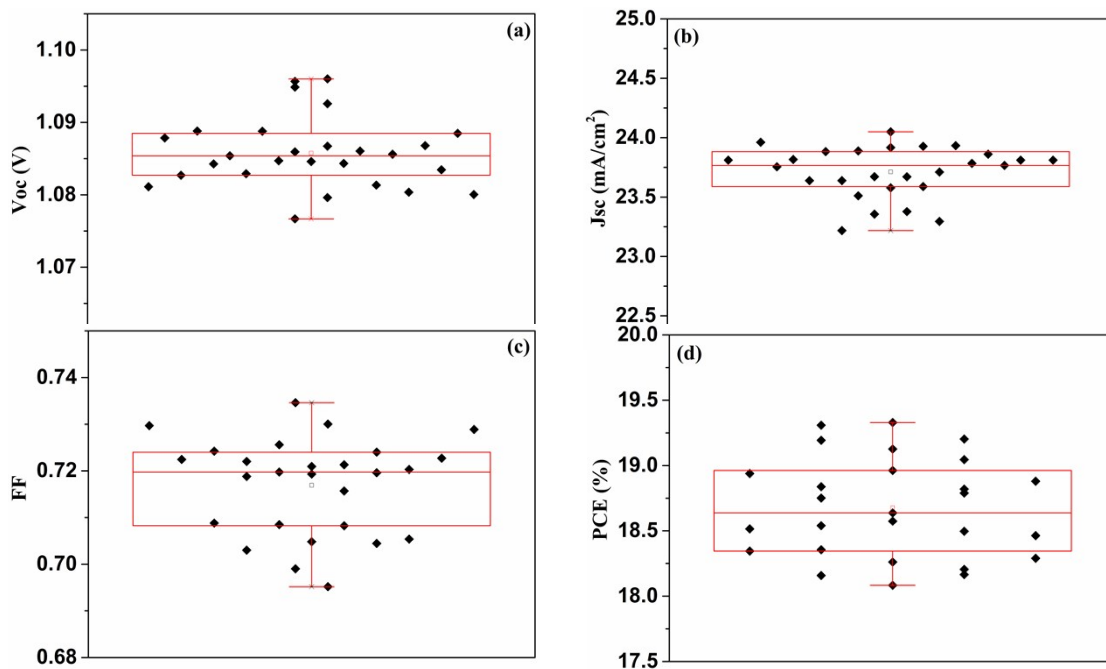

Fig.S6 Statistical parameters of PSCs deposited on Q-ETLs annealed at 100° C (a) open-circuit voltage, (b) J<sub>SC</sub>, (c) fill factor,(d) PCE.

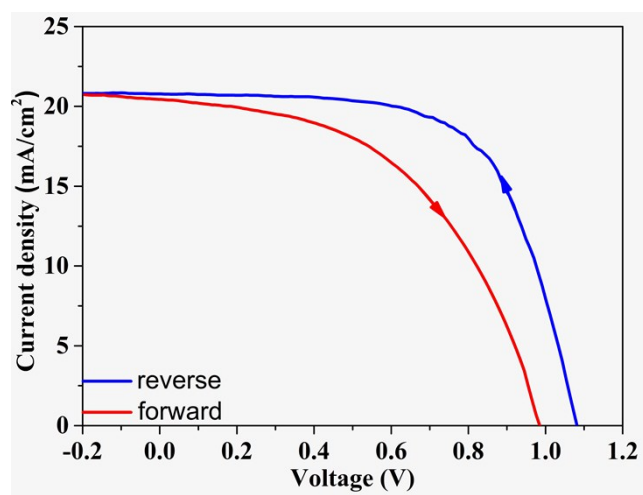

Fig.S7 J-V curves of a device prepared on PEN flexible substrate with Q-ETL annealing at 100°C.
